# **Mouse NEMP1 is required for erythropoiesis, nuclear envelope openings and enucleation of erythroblasts**

## **Short title: NEMP1 supports erythropoietic differentiation**

Didier Hodzic<sup>1,#,\*</sup>, Jun Wu<sup>2,\*</sup>, Karen Krczma<sup>2</sup>, Andrea Jurisicova<sup>3</sup>, Yonit Tsatskis<sup>3</sup>, Yijie Liu<sup>4</sup>, Peng Ji<sup>4</sup>, Kyunghee Choi<sup>2,#</sup> and Helen McNeill<sup>1,#</sup>

<sup>1</sup>Department of Developmental Biology, <sup>2</sup>Department of Pathology and Immunology, Washington University School of Medicine, 660 S. Euclid Ave, St Louis, MO, 63110;

<sup>3</sup>Lunenfeld-Tanenbaum Research Institute, Sinai Health Systems, 25 Orde St., Toronto, ON; <sup>4</sup>Department of Pathology, Feinberg School of Medicine, Northwestern University,

303 East Chicago Avenue, Chicago, IL, 60611.

\*Equal contributions, # Corresponding authors

#Helen McNeill, Department of Developmental Biology, Washington University School of Medicine, 660 S. Euclid Ave, St Louis, MO, 63110. [mcneillh@wustl.edu](mailto:mcneillh@wustl.edu), phone: 314-273-3050

#Kyunghee Choi, Department of Pathology and Immunology, Washington University School of Medicine, 660 S. Euclid Ave, St Louis, MO, 63110, [kchoi@wustl.edu](mailto:kchoi@wustl.edu), phone: 314-362-8716

#Didier Hodzic, Department of Developmental Biology, Washington University School of Medicine, 660 S. Euclid Ave, St Louis, MO, 63110, [dhodzic@wustl.edu](mailto:dhodzic@wustl.edu), phone: 314-273-3051

## KEY POINTS

- *Nemp1* KO mice have peripheral blood defects, splenomegaly and stress erythropoiesis linked to erythroid lineage differentiation defects
- NEMP1 is required for NE openings and enucleation of erythroblasts

## ABSTRACT

Nuclear Envelope Membrane Proteins (NEMP) are a conserved family of nuclear envelope proteins that reside within the inner nuclear membrane. Even though *Nemp1* knockout (KO) mice are overtly normal, they display a pronounced splenomegaly. This phenotype and recent reports describing a requirement for nuclear envelope openings during erythroblasts terminal maturation led us to examine a potential role for Nemp1 in erythropoiesis. Here, we report that *Nemp1* knockout (KO) mice show peripheral blood defects, anemia in neonates, ineffective erythropoiesis, splenomegaly and stress erythropoiesis. The erythroid lineage of *Nemp1* KO mice is overrepresented until the pronounced apoptosis of polychromatophilic erythroblasts. We show that NEMP1 localizes to the nuclear envelope of erythroblasts and their progenitors. Mechanistically, we discovered that NEMP1 accumulates into aggregates that localize near or close to the edge of nuclear envelope openings and *Nemp1* deficiency leads to a marked decrease of both nuclear envelope openings and ensuing enucleation. Together, our results for the first time demonstrate that NEMP1 is essential for nuclear envelope openings and erythropoietic maturation *in vivo* and provide the first mouse model of defective erythropoiesis directly linked to the loss of an inner nuclear membrane protein of the nuclear envelope.

## INTRODUCTION

Nuclear Envelope Membrane Protein1 (NEMP1, encoded by *Tmem194a*) is a highly conserved multipass transmembrane protein that resides within the inner nuclear membrane (INM) of the nuclear envelope (NE). We recently showed that genetic inactivation of *Nemp1* leads to a loss of fertility in worm, fish, and flies<sup>1</sup>. In mice, *Nemp1* is required for female fertility but dispensable for male fertility<sup>1</sup>. Except for the presence of a conserved domain of unknown function (DUF 2215) that encompasses its transmembrane and proximal nucleoplasmic C-terminal region, NEMP1 does not harbor any known functional motif. However, its nucleoplasmic region has been shown to interact with barrier to autointegration factor (BAF) and RAN GTPase to mediate *Xenopus* eye development<sup>2,3</sup>. NEMP orthologs (PNET2a, b and c) have recently been identified in plants where they play essential role in chromatin architecture<sup>4</sup>. Using BioID as well as affinity purification followed by mass spectrometry, we recently showed that NEMP1 interacts with LEM domain proteins EMERIN, MAN1 and LAP2, known to physically link the NE to chromatin and support mechanical stiffness. Accordingly, we showed that loss of *Nemp1* expression drastically affects NE mechanical stiffness in cultured cells and oocytes<sup>1</sup>.

Mammalian erythropoiesis consists of the differentiation of hematopoietic stem cells into megakaryocyte-erythrocyte progenitors (MEPs) that generate burst forming unit-erythroid (BFU-E) that in turn differentiate into colony forming unit-erythroid (CFU-E). The latter generate proerythroblasts (ProE) that correspond to the first recognizable erythroid cell. During terminal erythropoiesis, ProE undergoes 4-5 mitoses that generate

basophilic (EryA), polychromatophilic (EryB) and orthochromatic (EryC) erythroblasts. Erythroblast differentiation is characterized by chromatin condensation which is required for enucleation, the ultimate step of erythropoiesis that generates pyrenocytes and reticulocytes<sup>5-8</sup>. In addition, recent studies have established that recurrent NE openings in maturing erythroblasts allow for the partial and selective release of histones in the cytoplasm, a biological process that is essential for chromatin condensation and final enucleation<sup>9-12</sup>. However, the role of NE proteins in this remarkable biological process remains to be established.

Adult *Nemp1* knockout (KO) mice are overtly normal. However, we observed that both *Nemp1* KO males and females display strikingly enlarged spleens. Here, we examined the biological function of *Nemp1* in erythropoiesis. We show that *Nemp1* KO mice display erythroid lineage differentiation defects. Polychromatophilic erythroblasts displayed reduced frequencies of NE openings and of enucleation as well as increased apoptosis, leading to erythroid maturation defects. These data show that NEMP1 is required for NE openings and enucleation during the late stages of erythroblast maturation.

## **MATERIAL AND METHODS**

### **Animals**

Animal protocols used in this study strictly adhered to the ethical and sensitive care and use of animals in research and were approved by the Washington University School of Medicine Animal Studies Committee (Animal Welfare Insurance Permit #A-3381-01, protocol#21-0206). *mNemp1* (*Nemp1*<sup>em#(TCP)McNeill</sup>) CRISPR KO allele was obtained by

CRISPR-Cas9-mediated deletion of exon3 that is present in all *mNemp1* transcripts (Toronto Center for Phenogenomics). Mice were generated and maintained on a C57Bl6N background<sup>1</sup>.

### **Antibodies**

Rat Ter119-Alexa647 (Biolegend, #116218, 1:200), rabbit Nemp1 (1:1,000), mouse Lap2 (BD Biosciences, #611000, 1:200), Rat ckit-Alexa647 (#105817, 1:200), goat LaminB1 (Santa Cruz Biotechnology) were used for immunofluorescence microscopy. Fluotag-X4 anti-Rabbit IgG-Atto488 (Nanotag, #N2404, 1:500) and FluotagX2 anti-mouse IgG-AberioSTAR-580 (Nanotag, #N1202, 1:500) were used as secondary antibodies. Rat Ter-119-PE (Biolegend, #116208, 1:200), Rat CD71-APC (Biolegend, #113820, 1:200) were used for FACS and flow imaging. Histone3 (Abcam, #1791, 1:2000), Nemp1 (1:1000) and Ter119-Biotin (Biolegend, #116204, 1:500) were used for immunoblotting.

### **Bone marrow, spleen and fetal liver cells collection**

Two to four month-old mice were euthanized by CO<sub>2</sub> inhalation. Legs were separated at the pelvic-hip joint and femurs and tibia cleaned off from tendons and muscle tissues in cold PBS. Bones were cut on their extremities and transferred into collection units consisting of 0.5 ml tubes with pre-perforated (18 gauge needle) bottoms inserted in 1.5 ml collection tubes. Collections units were centrifuged 4 min at 6000 RPM at 4C. Pellets of BM cells were then resuspended in 1 ml of FACS buffer (0.5% BSA and 2mM EDTA in PBS), transferred to a 40uM cell strainer and washed with 10 ml of FACS buffer. Cell suspensions were then spinned down for 3 min at 3,000 RPM. Pellets were resuspended

in 2 ml of FACS buffer and fixed by adding 3.5 ml of fixation/permeabilization buffer (BD Biosciences) and rocking overnight at 4C. Cells were then washed in permeabilization buffer (BD Biosciences) through three cycles of centrifugation for 3 min at 850g and stored at 4C for further use. Dissected spleens or fetal livers were mechanically dissociated in 1 ml FACS buffer and the whole suspension transferred to a strainer for processing as described above for BM.

### **Flow imaging**

One million fixed BM and spleen cells were immunolabelled for one hour at room temperature with Ter119-PE (1:200, Biolegend) and 1ug/ml Hoechst 33342 (Thermofisher) in permeabilization buffer and then washed in PBS through three cycles of centrifugation for 3 min at 850g. The final pellet was resuspended in 40 µl PBS for image flow analysis. Data were acquired on an AMNIS ImageStreamX multispectral imaging flow cytometer (Luminex) using the Inspire software package. All images were acquired with the 60X objective with Hoechst (405 laser line), Ter119PE (488 laser line) and brightfield imaged in channels 1, 3 and 4, respectively. Laser intensities were adjusted to avoid signal saturation. Single fluorophore labeling were used to build a compensation matrix. Post-acquisition data analyses were performed with the IDEAS software package. For measurements of Ter119+ erythroid populations, cells in focus (gradient RMS) were gated on Hoechst+ cells that were subsequently plotted for Ter119 intensity.

### **Immunofluorescence confocal microscopy**

For immunostaining of intracellular epitopes, fixed BM cells were washed and permeabilized three times in Perm/wash buffer (BD Biosciences) supplemented with 0.1% TritonX100 and further incubated in the same buffer with primary antibodies overnight at 4C. After three washes, cells were incubated with secondary antibodies and with fluorescently labeled antibodies against extracellular epitopes for 2 hours at room temperature and then washed three times with three cycles of centrifugation for 3 min at 850g. Cells pellet were resuspended in 20ul of PBS. 3  $\mu$ l of cell suspension were mixed with 10ul of fluorescence mounting medium (Dako) and mounted for downstream confocal imaging. All images were acquired on a Nikon confocal microscope with a 1.4 NA 100X objective. Images denoising and 3D reconstruction were performed with the NIS-Element software package suite.

### **Analysis of mouse peripheral blood**

Whole blood was collected by venipuncture of the facial vein and immediately transferred in blood collection tubes (BD Microtainer). Blood samples were mixed and placed under the Hemavet HV950 probe (Drew Scientific, Inc.) for analysis using reagents from the LV-PAK (Drew Scientific Inc.). Multi-Trol mouse serum controls (Drew Scientific, Inc.) were used for calibration of the Hemavet HV950. Collected blood was also spread on glass slides for Wright-Giemsa staining according to the manufacturer's protocol (Wright-Giemsa Stain Modified, Sigma-Aldrich).

### **In vitro colony-forming assay**



Methylcellulose colony-forming assay were performed using Epo-only MethoCult 3334 (Stem Cell Technologies) according to the manufacturer's instructions. BM ( $6 \times 10^4$  cells/mL) or spleen ( $1 \times 10^5$  cells/mL) cells were mixed with M3334 methylcellulose and plated in triplicates using 35mm Petri-dishes. Cultures were maintained in a humidified incubator at 37°C, 5% CO<sub>2</sub>. CFU-E colonies were counted after 2-3 days of culture. BFU-E colonies were counted 5 days after culturing.

### **Acute Anemia and Splenectomy**

Acute hemolytic anemia was induced by intraperitoneal injection of phenylhydrazine (PHZ) (Sigma) with a single dose of 100mg/kg. Splenectomy was performed at the Hope Center for Neurological Disorder at Washington University in St. Louis. Approximately 1 month later, the splenectomized mice were induced by PHZ for hemolytic anemia. Blood samples were collected by venipuncture of the facial vein at different time point, and hematologic parameters measured on a HemaVet HV950 complete blood count instrument.

### **Flow cytometry and cell sorting**

BM, spleen or fetal liver cells from WT or Nemp1 KO mice were dissociated, resuspended in PBS/0.5% BSA and passed through a 40uM cell strainer to obtain single-cell suspension before antibody staining. Analysis of erythroid maturation using CD71 and Ter119 was conducted as previously described<sup>13</sup>. Freshly isolated cells were stained at 4°C in PBS/0.5% BSA with purified anti-mouse CD16/32 to block Fc receptors and incubated with PE-Ter119 (TER-119) and APC-CD71 (R17217)

antibodies for 30 minutes at 4°C. DAPI was used to exclude dead cells from analysis. Where apoptosis was measured, immunostaining for Ter119 and CD71 was followed by a 15-minute incubation with FITC-conjugated Annexin-V and propidium iodide following the manufacturer's protocol (BD Biosciences). Flow cytometry was carried out on BD LSR II machine and BD FACSAria II was used for cell sorting. Gate strategy was performed as previously described<sup>13</sup>. The ProE gate contains CD71<sup>high</sup>Ter119<sup>intermediate</sup>. The Ter119<sup>high</sup> cells are further analyzed. Here CD71<sup>high</sup> cells are subdivided into less mature, large EryA erythroblasts (CD71<sup>high</sup>Ter119<sup>high</sup>FSC<sup>high</sup>) and smaller, more mature EryB erythroblasts (CD71<sup>high</sup>Ter119<sup>high</sup>FSC<sup>low</sup>). The most mature erythroblasts subset is EryC (CD71<sup>low</sup>Ter119<sup>high</sup>FSC<sup>low</sup>).

HSPC and committed progenitors staining were conducted as described previously<sup>14</sup>. Cells from BM were harvested in PBS/0.5% BSA, and quickly lysed with RBC lysis buffer for 1 min at 4°C. Cells were then stained with PE-Cy7 conjugated anti-Gr-1 (RB6-8C5), -Mac1 (M1/70), -B220 (RA3-6B2), -Ter119 (TER-119), -CD3 (17A2), in combination with APC-e780-c-Kit (2B8), PerCP-Cy5.5-Sca1 (D7), APC-CD48 (HM48-1), PE-CD150 (TC-12F12.2), FITC-CD34 (RAM34) and BV421-CD16/32 (93) antibodies for 30min on ice. Flow cytometry was carried out on BD Symphony A3 machine. Data were analyzed on FlowJo software (FlowJo, LLC). Different committed progenitors were defined as granulocyte-monocyte progenitor (GMP, CD34<sup>+</sup>CD16/32<sup>+</sup>Lin<sup>-</sup>c-Kit<sup>+</sup>Sca1<sup>-</sup>) cells, common myeloid progenitor (CMP, CD34<sup>+</sup>CD16/32<sup>-</sup> Lin<sup>-</sup>c-Kit<sup>+</sup>Sca1<sup>-</sup>) cells and megakaryocyte-erythrocyte progenitor (MEP, CD34<sup>-</sup>CD16/32<sup>-</sup> Lin<sup>-</sup>c-Kit<sup>+</sup>Sca1<sup>-</sup>).

## RESULTS

### ***Nemp1* KO mice have splenomegaly and abnormal erythropoiesis**

*Nemp1* KO mice displayed significantly enlarged spleens with increased cellularity compared to heterozygous *Nemp1* or wild type (WT) mice (Figure 1A, B, C). Wright-Giemsa staining of *Nemp1* KO blood smears showed red blood cells (RBCs) with irregular shapes and spiky membranes (Figure 1D, red arrows). Complete blood count (CBC) analyses of peripheral blood (PB) using a Hemavet further showed decreased RBC counts in neonates suggestive of anemia although adult mice showed no such obvious phenotype (Figure 1E and S1). RBCs showed decreased hemoglobin content and higher red cell distribution widths (RDW), reflecting irregular RBC membrane shapes, two phenotypes that persisted throughout life (Figure 1E and S1). Finally, FACS analysis of PB also showed increased percentage of immature RBCs in the circulation (Figure 1F). The bone marrow (BM) of *Nemp1* KO mice also appeared more densely packed and displayed increased cellularity by comparison to WT BM (Figure 1G).

To understand the nature and origin of erythroid defects, we quantified the erythroid population of BM and spleens from adult WT and *Nemp1* KO mice by using Ter119 and CD71 markers. Compared to WT BM, *Nemp1* KO BM showed increased Ter119+ cell population (Figure 1H) that was mostly accounted for by a significantly increased population of Ter119+CD71+ erythroblasts (Figure 1I). The increase in erythroblasts was also detected by flow imaging of Hoechst+Ter119+ populations (Figure 1J). In the adult spleen, FACS and flow imaging data showed similar increases in the representation of erythroblast population (Figure 1 K, L, M). WT and *Nemp1* KO fetal livers were also

analyzed. However, we did not detect any difference in erythroblast representation between WT and KO embryonic livers (Figure S2A) despite the expression of *Nemp1* in these cells (data not shown). Taken together, these data show that loss of *Nemp1* leads to a significant increase of the erythroid lineage in adult BM and spleens.

### **Erythroid progenitors and early erythroblast populations are expanded in *Nemp1* KO mice**

To trace the origin of erythroid lineage overrepresentation in *Nemp1* KO mice, we quantified hematopoietic precursors. Long-term hematopoietic stem cells (LT-HSCs, SLAMF6<sup>+</sup>KSL), hematopoietic stem and progenitor cells (HSPCs, KSL, ckit<sup>+</sup>/Sca1<sup>+</sup>/Lin<sup>-</sup>) as well as common myeloid progenitors (CMP, CD34<sup>+</sup>CD16/32<sup>-</sup>Lin<sup>-</sup>c-Kit<sup>+</sup>Sca1<sup>-</sup>) were equally represented in WT and *Nemp1* KO BM (Figure 2 A,B,C). In contrast, the megakaryocyte-erythrocyte progenitor (MEP, CD34<sup>-</sup>CD16/32<sup>-</sup>Lin<sup>-</sup>c-Kit<sup>+</sup>Sca1<sup>-</sup>) population was significantly increased with a concomitant decrease of the granulocyte-macrophage progenitor (GMP, CD34<sup>+</sup>CD16/32<sup>+</sup>Lin<sup>-</sup>c-Kit<sup>+</sup>Sca1<sup>-</sup>) population (Figure 2C) in *Nemp1* KO BM. In agreement with this increase in MEPs, *Nemp1* KO BM cells consistently showed a higher capacity to generate BFU-E (Figure 2D). Together, these results indicate that the earliest phenotype resulting from the lack of *Nemp1* expression is the expansion of MEPs in the hematopoietic cascade.

To better understand the erythroid differentiation defects in *Nemp1* KO mice, we next examined the representation of ProE, EryA, EryB, and EryC erythroblasts using the gating strategy shown in Figure 2E. Consistent with increased MEP population and higher BFU

formation capacity in *Nemp1* KO BM (Figure 2C, D), the ProE and EryA populations were increased, with EryA showing a more significant increase (Figure 2F, G). By contrast, the EryB and EryC were decreased, with EryB showing a more significant decrease, in the *Nemp1* KO BM. Whereas apoptosis was mildly reduced in EryA, the apoptotic EryB population was significantly higher in *Nemp1* KO BM (Figure 2H). Similar trends were also observed in the spleen (Figure 2I, J, K). Notably, the representation of EryA, B, and C populations remained unchanged in fetal livers (Figure S2B) suggesting that the loss of *Nemp1* expression specifically affects adult erythropoiesis. Collectively, these data indicate that genetic ablation of *Nemp1* leads to the expansion of MEPs to EryA populations and to a decrease of EryB and EryC populations. Increased apoptosis in EryB probably accounts for the loss of RBC. Our data suggests that NEMP1 is required for erythroid maturation, especially from EryA to EryB.

### ***Nemp1* KO mice display increased splenic stress erythropoiesis in homeostatic conditions**

Given the compromised erythropoiesis in the BM, we assessed whether spleen enlargement in *Nemp1* KO mice might be due to stress erythropoiesis. Previous studies have shown that the splenic cKit<sup>+</sup>CD71<sup>med</sup>/-Ter119<sup>lo</sup>/- cell population contains stress BFU-Es<sup>15</sup>. When WT and *Nemp1* KO cKit<sup>+</sup> cells from the spleen were assessed for CD71 and Ter119 expression, *Nemp1* KO spleens showed a ~5-fold increase in c-kit<sup>+</sup>/CD71<sup>+</sup>/Ter119<sup>-</sup> erythroid progenitors compared to WT spleens (Figure 3A,B). Consistently, Epo responsive BFU-E and CFU-E were significantly increased in *Nemp1* KO spleens (Figure 3C, D). If indeed *Nemp1* KO mice have a higher number of stress-

erythroid progenitors (SEP), we expected that *Nemp1* KO mice might recover relatively normally from acute anemia induced by phenylhydrazine (PHZ). Thus, WT and *Nemp1* KO mice were treated with PHZ and monitored for peripheral RBC recovery. As expected, *Nemp1* KO mice recovered similarly to WT mice from PHZ induced anemia (Figure 3E). We monitored peripheral RBCs after splenectomy to assess the splenic SEP contribution to ongoing erythropoiesis. We found that RBCs, Hb, and HCTs in the periphery were greatly reduced in *Nemp1* KO mice compared to WT mice (Figure 3F). Mean corpuscular volume (MCV) and RDW measures were significantly increased in *Nemp1* KO mice (Figure 3F). When splenectomized WT and *Nemp1* KO mice were challenged with PHZ, *Nemp1* KO mice showed much reduced recovery of RBC, Hb, and HCT (Figure 3G). Collectively, these data suggest that *Nemp1* deficient mice have increased stress erythropoiesis occurring in the spleen.

### **NEMP1 is required for erythroblast NE openings, nuclear compaction and nuclear extrusion**

Using a NEMP1 antibody directed towards a stretch of 15 amino acids from the C-terminal region of NEMP1 (Figure S3A)<sup>1</sup>, NEMP1 (49.8 kDa) was detected both in lysates of sorted WT CD11b<sup>+</sup> myeloid and Ter119<sup>+</sup> erythroid cells but not in their KO counterparts (Figure 4A). In immunofluorescence confocal microscopy, NEMP1 was detected at the NE of ProE, EryA, B and C erythroblasts where it colocalized with LAP2, a well-established NE marker (Figure 4B). However, NEMP1 noticeably formed occasional NE puncta of higher intensity whereas LAP2 was homogenously distributed on the NE of erythroblasts (Figure 4B). NEMP1 was also detected at the NE of cKit<sup>+</sup>/Ter119<sup>-</sup> progenitors (Figure S3B).

NEMP1 was undetectable at the NE of BM cells isolated from *Nemp1* KO mice demonstrating the specificity of the NEMP1 antibody (Figure S3C). Taken together, these results show that NEMP1 is ubiquitously expressed at the NE of the erythroid lineage.

Late stages of erythroblast maturation are characterized by the progressive compaction of chromatin and its partial release into the cytoplasm via transient openings of the NE, which is most prominent in the polychromatophilic stage<sup>9,10</sup>. As shown in Figure 4C, NE openings were clearly identified with NEMP1 and LAP2 antibodies in Ter119+ erythroblasts. This phenomenon is distinct from nuclear extrusion as the cytoplasmic membrane labelled with Ter119 remains intact (Figure 4C). 3D reconstruction of confocal Z-stacks clearly emphasized NE openings delineated by NEMP1 through which chromatin protrudes into the cytoplasm (Figure 4D and video S1).

Interestingly, the close examination of successive confocal planes encompassing NE openings revealed the accumulation of NEMP1 into higher intensity aggregates (Figure 4E). Maximum intensity projections also showed that NEMP1 aggregates preferentially accumulated near or close to NE openings (Figure 4E, bottom panel). In contrast, the localization of LAP2 remained uniform and did not accumulate into NEMP1 aggregates. Intensity profiles showed that NEMP1 was 2 to 3 times more abundant in aggregates at NE openings by comparison to intact NE (Figure S3D). To better appreciate the spatial distribution of *Nemp1* aggregates relative to NE openings in three dimensions (3D), we performed intensity thresholding of confocal slices followed by 3D reconstruction and  $\alpha$ -blending. As shown in Figure 4F, multiple NEMP1 aggregates localized close to or near

the edges of NE opening sites delineated by Lap2 (Figure 4F, top and video S2). Interestingly, small NE openings already displayed a few NEMP1 aggregates at their edges (Figure 4F, bottom panel and video S3). NEMP1 aggregates were undetectable at the NE of *Nemp1* KO erythroblasts thereby confirming the specificity of these structures (Figure S3E).

To determine if NEMP1 is required for NE openings, WT and *Nemp1* KO BM were immunostained with Lamin B1. Loss of *Nemp1* expression led to a significant decrease of NE opening frequencies suggesting a role for NEMP1 in NE openings (Figure 4G). We also observed a significant increase of nuclear size in *Nemp1* KO BM cells that may be indicative of decreased chromatin compaction (Figure 4H).

Because chromatin compaction is required for enucleation<sup>9</sup>, we next examined whether NEMP1 is required for enucleation. As shown in Figure 5A, NEMP1 decorated the NE with occasional puncta at all described stages of enucleation<sup>16</sup>. We used two approaches to determine whether genetic ablation of *Nemp1* affects nuclear extrusion. First, lineage negative cells from wild type and *Nemp1* KO mice were purified from BM, cultured for 2 days in erythropoietin-containing medium and analyzed to distinguish nucleated vs non-nucleated Ter119+ cells. As shown in Figure 5B, although erythroblast differentiation was not affected, the ratio of nucleated erythroblasts vs enucleated RBC Ter119+ cells was increased in cultures derived from *Nemp1* KO BM. In agreement with these data and using flow imaging as a second approach, we consistently measured a higher ratio of nucleated Ter119+ cells in *Nemp1* KO BM by comparison to WT BM cells (Figure 5C).



Taken together, these results indicate that NEMP1 plays a role in NE openings and nuclear extrusion.

## DISCUSSION

In this work, we show that loss of *Nemp1* results in erythroid maturation defects and the significant expansion of the erythroid lineage in adult BM and spleens (Figure 6). As a consequence, *Nemp1* KO mice display splenomegaly with stress erythropoiesis occurring in the spleen.

The higher capacity of *Nemp1* KO BM and spleens to generate BFU-E and CFU-E and the significant expansion of ProE and EryA populations together show that erythroid expansion is taking place throughout the EryA stage in *Nemp1* KO mice. MEP expansion was notably associated with a significant decrease in GMPs, suggesting that *Nemp1* may have an additional biological function in non-erythroid lineages. Alternatively, GMP decrease may reflect compensatory mechanisms in response to erythroid lineage expansion. Interestingly, erythroid expansion is specific to adult erythropoiesis as *Nemp1* KO fetal livers neither displayed erythroid lineage amplification nor an imbalance of Ery A, B, or C populations.

We detected the expression of NEMP1 at the NE of erythroblasts and cKit<sup>+</sup> progenitors by immunofluorescence microscopy and in purified Ter119<sup>+</sup> erythroid cells by immunoblotting which is in agreement with its identification in proteomic analyses of the human erythroid cells<sup>17</sup>. By contrast, the same proteomic analyses show that human

erythroblasts do not express *Nemp2*, a homolog of *Nemp1*<sup>17</sup>. Accordingly, *Nemp2* KO mice do not display any splenomegaly or blood defects, and *Nemp1* phenotypes were not worsened in *Nemp1/2* double knockout (DKO) mice (data not shown). Taken together, we conclude that *Nemp1* is specifically required for the normal homeostasis of the adult erythroid lineage. To our knowledge, this is the first report describing the involvement of an integral transmembrane protein of the NE in erythropoiesis. However, it is interesting to note that genetic inactivation that specifically knocks out LAP2 $\alpha$ , a LAP2 isoform devoid of transmembrane domain and that localizes in the nucleoplasm, also leads to the overrepresentation of the erythroid lineage<sup>18</sup>.

We speculate that the overrepresentation of erythroid progenitors and EryA as well as the stress erythropoiesis we observed in spleen originate from a feedback loop due to the massive loss of EryB erythroblasts. Indeed, in contrast to their progenitors and EryA precursors, EryB and EryC populations were markedly decreased in *Nemp1* KO BM and RBC counts were significantly lower in the peripheral blood of neonate and young *Nemp1* KO mice. This decrease of EryB and EryC populations was accompanied by a marked increase of apoptosis that was especially pronounced in EryB from BM. We reason that this apoptosis stems from key biological functions of NEMP1 in NE openings during terminal erythropoiesis. First, *Nemp1* transcripts are significantly upregulated during terminal differentiation<sup>19</sup> and *Nemp1* expression level peaks in EryB/polychromatophilic erythroblasts<sup>17</sup>. Second, in erythroblasts undergoing NE openings, NEMP1 accumulates into aggregates that preferentially localized near or at NE openings. Importantly, this aggregation is specific to NEMP1 as LAP2 remains uniformly distributed at NE openings.

It is possible that increased levels of NEMP1 expression reported in proteomic screens at that differentiation stage<sup>17</sup> reflects the accumulation of Nemp1 into aggregates. Finally, we directly show that lack of *Nemp1* expression in erythroblasts is linked to reduced frequencies of NE openings. Taken together, we propose that the increased apoptosis measured in *Nemp1* KO EryB and EryC stems from the requirement of NEMP1 aggregates for efficient NE openings. In support of this idea, inhibition of NE openings is directly linked to induction of cell death in G1ER cells<sup>9</sup>.

An alternative but not exclusive origin of elevated apoptosis in EryB erythroblasts may also stem from a biological function of NEMP1 in chromatin organization. Indeed, we recently reported the interaction of NEMP1 with LEM domain-containing proteins EMERIN, LAP2 and MAN1<sup>1</sup> that are also expressed in erythroblasts<sup>17</sup> and play essential roles in chromatin organization in cooperation with BAF<sup>20</sup>. In addition, the genetic ablation of NEMP proteins in plants (PNET2) leads to major disruptions of higher-order chromatin organization<sup>4</sup> and *Nemp1* KO erythroblasts displayed larger nuclear sizes. Impaired nuclear extrusion in *Nemp1* KO erythroblasts may also contribute to increased apoptosis levels. Future studies are needed to determine whether NEMP1 intrinsically affects nuclear extrusion or if decreased enucleation in *Nemp1* KO BM is a mere consequence of impaired NE openings.

How NEMP1 aggregates form at the NE of erythroblasts undergoing NE openings requires more investigation. Biochemical studies have shown that Nemp1 oligomerizes via the transmembrane domains<sup>3</sup>. Hence, one possibility is that NEMP1 aggregates

originate from the multimerization of NEMP1. We know that NEMP1 supports NE stiffness in the germline and cultured cells<sup>1</sup> and the NE stiffness of erythroblasts may very well be affected by NE openings. Alternatively, Nemp1 aggregates may support the nuclear envelope during the physical stresses that occur during the dramatic remodeling that occurs during erythroblast nuclear condensation and enucleation.

Zhao et al.<sup>7,9</sup> have shown that NE openings are blocked by inhibition of caspase-3 or through the expression of a caspase-3 non-cleavable Lamin B1 mutant. As a result, histone release from the nucleus, chromatin condensation and the terminal differentiation of erythroid cells are also affected *in vitro*. These data and our current findings therefore further stress the biological relevance of NE openings during terminal erythropoiesis. Finally, because Caspase-3 KO mice show relatively mild erythroid defects most likely due to *in vivo* compensatory pathways<sup>9</sup>, *Nemp1* KO mice provide the first mouse model of acute erythropoietic defects linked to NE openings deficiency. In conclusion, our results uncovered the involvement of *Nemp1* in NE openings and enucleation in erythroblasts and its requirement for normal erythropoiesis.

## ACKNOWLEDGEMENTS

H.M. is supported by the BJC Investigator Program at Washington University School of Medicine in St Louis, K.C. by the National Heart, Lung, and Blood Institute (NHLBI, R01-HL55337 and R01-HL149954), P.L. by the National Institute of Diabetes and Digestive and Kidney Disease (NIDDK, R01-DK124220) and the National Heart, Lung, and Blood Institute (NHLBI, R01-HL148012, and R01-HL150729). AJ is supported by Canadian Institutes of

Health Research (MOP- 156081). The authors would like to thank the Phenotyping core at TCP for assistance with blood analysis.

## **AUTHOR CONTRIBUTIONS**

H.M., K.C., P.J. A.J., D.H. and J.W. conceived and designed experimental approaches and participated in manuscript writing and review; D.H., J.W., K.K, Y.B. and Y.L performed experiments, data collection and assembly. All authors participated in data analyses and have proved the final version of the manuscript.

## **CONFLICT OF INTEREST DISCLOSURES**

The authors declare no competing financial interests

## **FIGURE LEGENDS**

**Figure 1: *Nemp1* KO mice display splenomegaly, blood defects and erythroid lineage expansion.** Representative spleen size (**A**) and spleen/body weight ratios (**B**) across genotypes. Scale bar: 1 cm. **C.** H&E staining of WT and *Nemp1*KO spleen. **D.** Wright-Giemsa staining of WT and *Nemp1* KO blood smears. Red arrows point to cytoplasmic membrane spikes of *Nemp1* KO RBCs. **E.** Hemavet measurement of red blood cells (RBC), red blood cells distribution width (RDW) and hemoglobin (Hb) content of *Nemp1*KO blood from postnatal day 4 (P4) and P10. 6, 3, 5 and 4 mice were respectively analyzed for RBC, Hb and RDW measurements for P4 WT, P4 KO, P10 WT and P10 KO mice. **F.** Percentage of immature nucleated erythroblasts in peripheral blood of indicated genotypes. **G.** H&E staining and quantification of cellularity of WT and *Nemp1*KO BM. **H, I.** Percentage of Ter119+ (**H**) and Ter119+/CD71+ (**I**) cells in WT and *Nemp1* KO BM assessed by FACS. **J.** Percentage of nucleated Ter119+/Hoechst+ cells in WT and

*Nemp1* KO BM measured by flow imaging. **K,L.** Percentage of Ter119+ (H) and Ter119+/CD71+ (I) cells in WT and *Nemp1* KO spleen assessed by FACS. **M.** Percentage of nucleated Ter119+/Hoechst+ cells in WT and *Nemp1* KO spleen measured by flow imaging. Data are shown as mean  $\pm$  SD. Student's t-test. ns. not significant, \* $p < 0.05$ . \*\* $p < 0.01$ . \*\*\* $p < 0.001$ . \*\*\*\* $p < 0.0001$ .

**Figure 2: Loss of *Nemp1* leads to the expansion of erythroid progenitors and early erythroblasts.** Quantification of LT-HSCs (A), HSPCs (B), CMPs, GMPs and MEPs progenitors (C). **D.** BFU-E formation capacity of WT and *Nemp1* KO BM. **E.** FACS sorting strategy used to quantify ProE and Ery A, B, C populations from whole BM and spleen. Representative FACS analyses and quantification of ProE, EryA, B and C populations in WT and *Nemp1*KO BM (F, G) and spleens (I, J). Apoptotic indexes of the same respective populations in WT and *Nemp1* KO BM (H) and spleen (K). Data are shown as individual subject and the mean  $\pm$  SD. Student's t-test. ns. not significant, \* $p < 0.05$ . \*\* $p < 0.01$ . \*\*\* $p < 0.001$ . \*\*\*\* $p < 0.0001$ .

**Figure 3: *Nemp1* KO mice display increased splenic stress erythropoiesis.**

Representative FACS analysis (A) and quantification (B) of SEPs in dissociated WT and *Nemp1* KO spleens. Comparisons of BFU-E (C) and CFU-E (D) formation capacity between WT and *Nemp1*KO dissociated spleens. Data are shown as individual subject and the mean  $\pm$  SD. Student's t-test. \*\*\*\* $p < 0.0001$ . Complete blood count (CBC) analysis of WT (n=5) and KO (n=5) mice during the entire recovery period following PHZ treatment (100mg/kg). Data are show as geometric mean  $\pm$  95% of difference. Using two-way ANOVA test: \*,  $p = 0.0112$ . (E). CBC analysis of WT (n=6) and KO (n=6) mice after splenectomy. Data are show as geometric mean  $\pm$  95% of difference. Using two-way ANOVA test: \*\*,  $p = 0.0012$  for RBC comparison;  $p = 0.0022$  for Hb comparison;  $p = 0.0045$  for MCV comparison; \*\*\*,  $p = 0.0007$  (F). CBC analysis of WT (n=6) and KO (n=6) mice after splenectomy plus PHZ treatment (100mg/kg). Data are show as geometric mean

± 95% of difference. Using two-way ANOVA test: \*, p=0.0102; \*\*, p=0.0078 for RBC comparison; p=0.0013 for Hb comparison; \*\*\*\*, p < 0.0001; (G).

**Figure 4: Nemp1 is required for NE openings in erythroblasts.** **A.** Immunodetection of endogenous NEMP1 in lysates from WT and Nemp1 KO myeloid (CD11b+) and erythroid (Ter119+) cells. Histone3 was used as a loading control and Ter119 to confirm myeloid/erythroid sorting specificity. **B.** Nemp1 immunostaining of WT BM erythroblasts. Lap2 was used as a control for NE labeling. ProE were identified based on low Ter119 expression and low nuclear circularity. Ery A, B and C were distinguished based on increasing Ter119 intensity and decreasing nuclear diameter (7.4, 6.4 and 5.4  $\mu\text{m}$  for EryA, B and C, respectively). The arrow points to discrete Nemp1 aggregates. **C.** Immunolocalization of Nemp1 and Lap2 in a WT erythroblast undergoing NE opening and chromatin release in the cytoplasm. The lower panel is a maximum intensity projection (Max I) of confocal slices encompassing the NE opening. Note the presence of Nemp1 aggregates close to or at the NE opening delineated by Lap2. **D.** 3D reconstruction (non-thresholded) of single confocal planes of a NE opening delineated by Nemp1 after denoising and  $\alpha$ -blending. Note the extrusion of chromatin through the NE openings within the cytoplasm. **E.** Successive confocal planes (0.5  $\mu\text{m}$  apart) of an erythroblast undergoing NE opening showing Nemp1 aggregates at NE opening sites. Note the presence of higher intensity aggregates of Nemp1 at or near NE openings delineated by Lap2. Bottom panel: Maximum intensity projection (Max I) of a Z-stack encompassing the NE opening. **F.** 3D reconstruction after  $\alpha$ -blending of confocal slices thresholded for Nemp1 intensity showing Nemp1 aggregates at or near to NE openings. The bottom panel shows a small NE opening already decorated with Nemp1 aggregates. **G.** Confocal imaging of LaminB1 in WT and Nemp1 KO BM cells and quantification of NE opening frequencies. **H.** Quantification of nuclear area in WT and Nemp1 KO BM cells.

**Figure 5: *Nemp1* is required for erythroblasts enucleation.** **A.** Immunolocalization of *Nemp1* at different stages of enucleation. Scale bars: 5  $\mu$ m. **B.** DNA and Ter119 FACS analysis of lineage-negative cells purified from WT and KO BM and subsequently cultured in erythropoietin-containing medium for 2 days. Note the higher nucleated/enucleated ratio in *Nemp1* KO cells. **C.** Quantification of nucleated and enucleated Ter119+ cells in WT and *Nemp1* KO BM measured by flow imaging. Right: representative quantification graphs of nucleated (Hoechst+Ter119+) and enucleated (Hoechst-Ter119+) in WT and *Nemp1*KO BM in flow imaging.

**Figure 6: Graphical depiction of *Nemp1* phenotypes and functions during erythropoiesis.** Green and red arrows respectively depict increased or decreased populations in *Nemp1*KO by comparison to WT cells or biological processes affected by the lack of expression of NEMP1. Blue arrows depict increased apoptosis. See text for details.

## SUPPLEMENTAL FIGURE LEGENDS

**Figure S1: *Nemp1* KO mice have peripheral blood defects:** Hemavet measurement of red blood cells (RBC), red blood cells distribution width (RDW) and hemoglobin (Hg) content of *Nemp1*KO and WT blood from P4 to P150. N: number of biological replicates for each time point and genotype. Data are shown as mean  $\pm$  SD. Student's t-test. ns. not significant, \* $p$ <0.05. \*\* $p$ <0.01. \*\*\* $p$ <0.001. \*\*\*\* $p$ <0.0001.

**Figure S2: Loss of *Nemp1* does not affect embryonic Ter119+ erythroblast representation.** **A.** Quantification by FACS (left) or flow imaging quantification (right) of nucleated Ter119+ erythroblasts from E13.5 embryonic livers. **B:** Quantification of Ery A, B and C populations in WT and *Nemp1*KO fetal livers. N: biological replicates, ns: not significant.



**Figure S3: Nemp1 localizes at the NE of hematopoietic cells and aggregates at NE openings.** **A.** Topology of NEMP1 at the NE with the Nemp1 antibody epitope denoted in green. INM, ONM: inner and outer nuclear membrane, respectively. **B.** Immunolocalization of endogenous Nemp1 in cKit+ progenitors by confocal microscopy (top panel). A Ckit-/Ter119<sup>low</sup> ProE is shown for comparison (Bottom panel). **C.** Intensity profile lines showing Nemp1 peaks (green, nuclear envelope) that are distinct from Ter119 peaks (cytoplasmic membrane) in WT BM. Nemp1 peaks are not present in Nemp1 KO BM. **D.** Intensity profile lines comparing the intensity of Nemp1 in aggregates at the edge of NE openings to the intensity of Nemp1 in intact NE. Note the lack of accumulation of either Lap2 (red trace) or chromatin (blue trace) in Nemp1 aggregates. Right panel: Maximum intensity projection (Max I) of the same cell showing the preferential accumulation of Nemp1 aggregates near or at the edge of the NE opening. **E.** Maximum intensity projection of WT (top) or Nemp1 KO (bottom) erythroblasts undergoing NE opening. Note the absence of Nemp1 aggregates in Nemp1KO erythroblasts thereby confirming their specificity.

**Video S1:** Non-thresholded 3D reconstruction from confocal planes of an erythroblast undergoing nuclear envelope opening

**Video S2, S3:** 3D reconstruction from confocal planes (thresholded for Nemp1 intensity to emphasize Nemp1 aggregates, top panels) of erythroblasts undergoing a large (top) or small (bottom) nuclear envelope opening. Note the presence of Nemp1 aggregates near or close to NE openings.

## REFERENCES

1. Tsatskis Y, Rosenfeld R, Pearson JD, et al. The NEMP family supports metazoan fertility and nuclear envelope stiffness. *Sci Adv.* 2020;6(35):eabb4591.
2. Mamada H, Takahashi N, Taira M. Involvement of an inner nuclear membrane protein, Nemp1, in *Xenopus* neural development through an interaction with the chromatin protein BAF. *Dev Biol.* 2009;327(2):497-507.
3. Shibano T, Mamada H, Hakuno F, Takahashi S, Taira M. The Inner Nuclear Membrane Protein Nemp1 Is a New Type of RanGTP-Binding Protein in Eukaryotes. *PLoS One.* 2015;10(5):e0127271.
4. Tang Y, Dong Q, Wang T, Gong L, Gu Y. PNET2 is a component of the plant nuclear lamina and is required for proper genome organization and activity. *Dev Cell.* 2022;57(1):19-31 e16.
5. Menon V, Ghaffari S. Erythroid enucleation: a gateway into a "bloody" world. *Exp Hematol.* 2021;95:13-22.
6. Migliaccio AR. Erythroblast enucleation. *Haematologica.* 2010;95(12):1985-1988.
7. Zhao B, Yang J, Ji P. Chromatin condensation during terminal erythropoiesis. *Nucleus.* 2016;7(5):425-429.
8. Barminko J, Reinholt B, Baron MH. Development and differentiation of the erythroid lineage in mammals. *Dev Comp Immunol.* 2016;58:18-29.
9. Zhao B, Mei Y, Schipma MJ, et al. Nuclear Condensation during Mouse Erythropoiesis Requires Caspase-3-Mediated Nuclear Opening. *Dev Cell.* 2016;36(5):498-510.
10. Hattangadi SM, Martinez-Morilla S, Patterson HC, et al. Histones to the cytosol: exportin 7 is essential for normal terminal erythroid nuclear maturation. *Blood.* 2014;124(12):1931-1940.
11. Zhao B, Liu H, Mei Y, et al. Disruption of erythroid nuclear opening and histone release in myelodysplastic syndromes. *Cancer Med.* 2019;8(3):1169-1174.
12. Zhen R, Moo C, Zhao Z, et al. Wdr26 regulates nuclear condensation in developing erythroblasts. *Blood.* 2020;135(3):208-219.
13. Koulis M, Pop R, Porpiglia E, Shearstone JR, Hidalgo D, Socolovsky M. Identification and analysis of mouse erythroid progenitors using the CD71/TER119 flow-cytometric assay. *J Vis Exp.* 2011(54).
14. Xu CX, Lee TJ, Sakurai N, et al. ETV2/ER71 regulates hematopoietic regeneration by promoting hematopoietic stem cell proliferation. *J Exp Med.* 2017;214(6):1643-1653.
15. Xiang J, Wu DC, Chen Y, Paulson RF. In vitro culture of stress erythroid progenitors identifies distinct progenitor populations and analogous human progenitors. *Blood.* 2015;125(11):1803-1812.
16. Nowak RB, Papoin J, Gokhin DS, et al. Tropomodulin 1 controls erythroblast enucleation via regulation of F-actin in the enucleosome. *Blood.* 2017;130(9):1144-1155.
17. Gautier EF, Ducamp S, Leduc M, et al. Comprehensive Proteomic Analysis of Human Erythropoiesis. *Cell Rep.* 2016;16(5):1470-1484.
18. Naetar N, Korbei B, Kozlov S, et al. Loss of nucleoplasmic LAP2alpha-lamin A complexes causes erythroid and epidermal progenitor hyperproliferation. *Nat Cell Biol.* 2008;10(11):1341-1348.
19. Choi J, Baldwin TM, Wong M, et al. Haemopedia RNA-seq: a database of gene expression during haematopoiesis in mice and humans. *Nucleic Acids Res.* 2019;47(D1):D780-D785.
20. Segura-Totten M, Wilson KL. BAF: roles in chromatin, nuclear structure and retrovirus integration. *Trends Cell Biol.* 2004;14(5):261-266.

# Figure 1

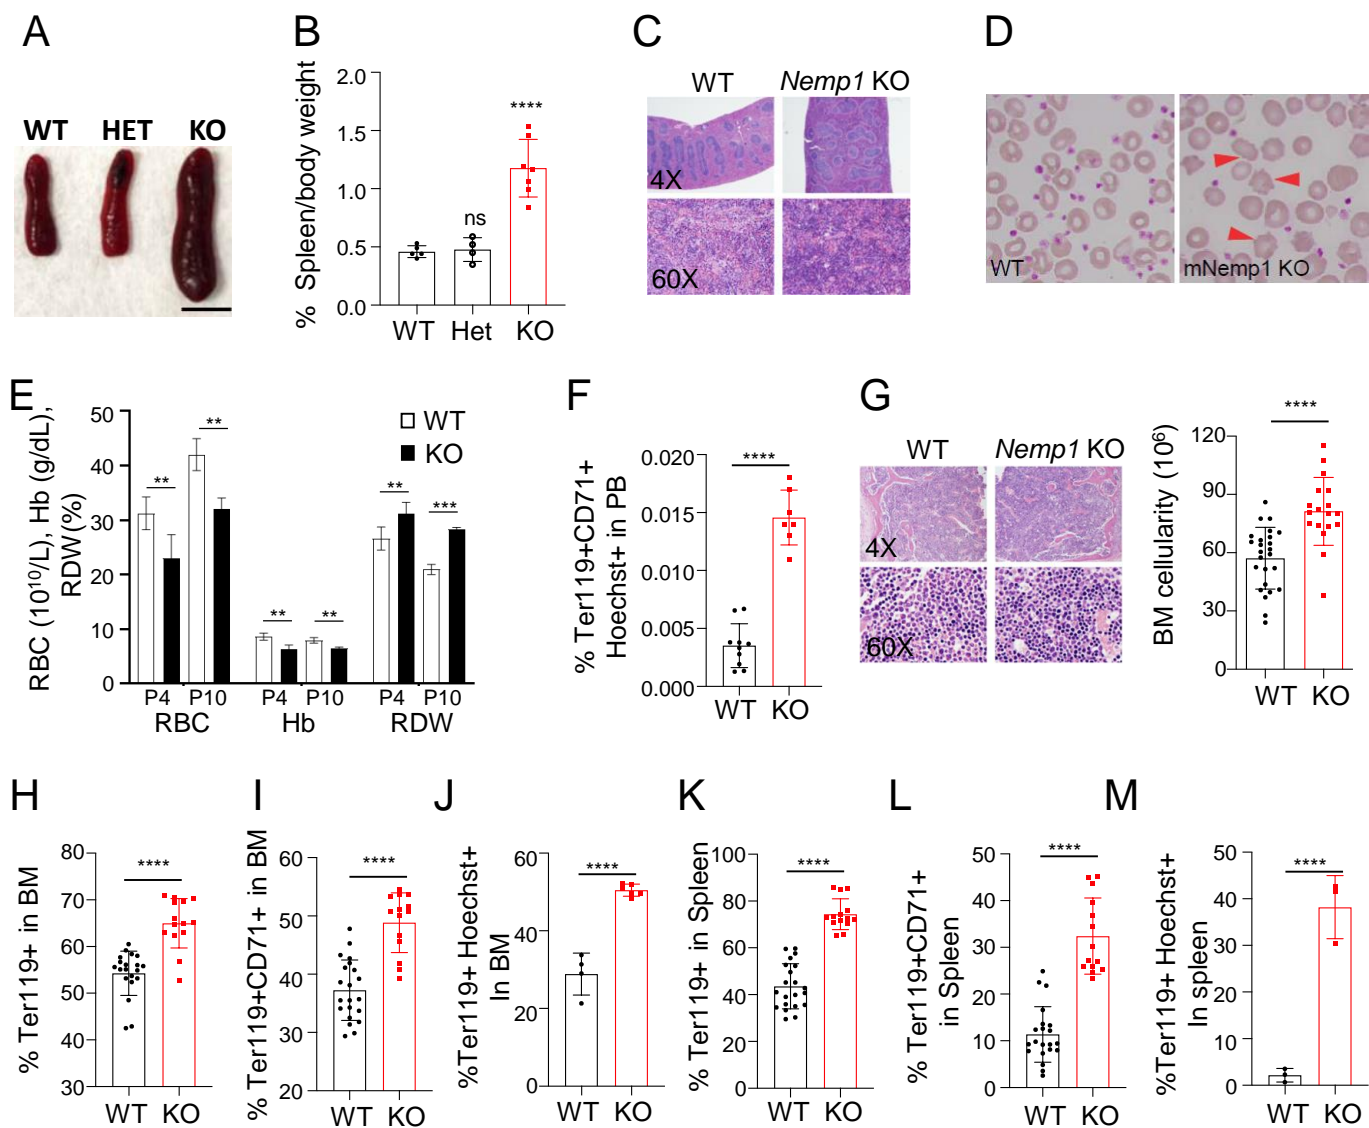

Figure 2

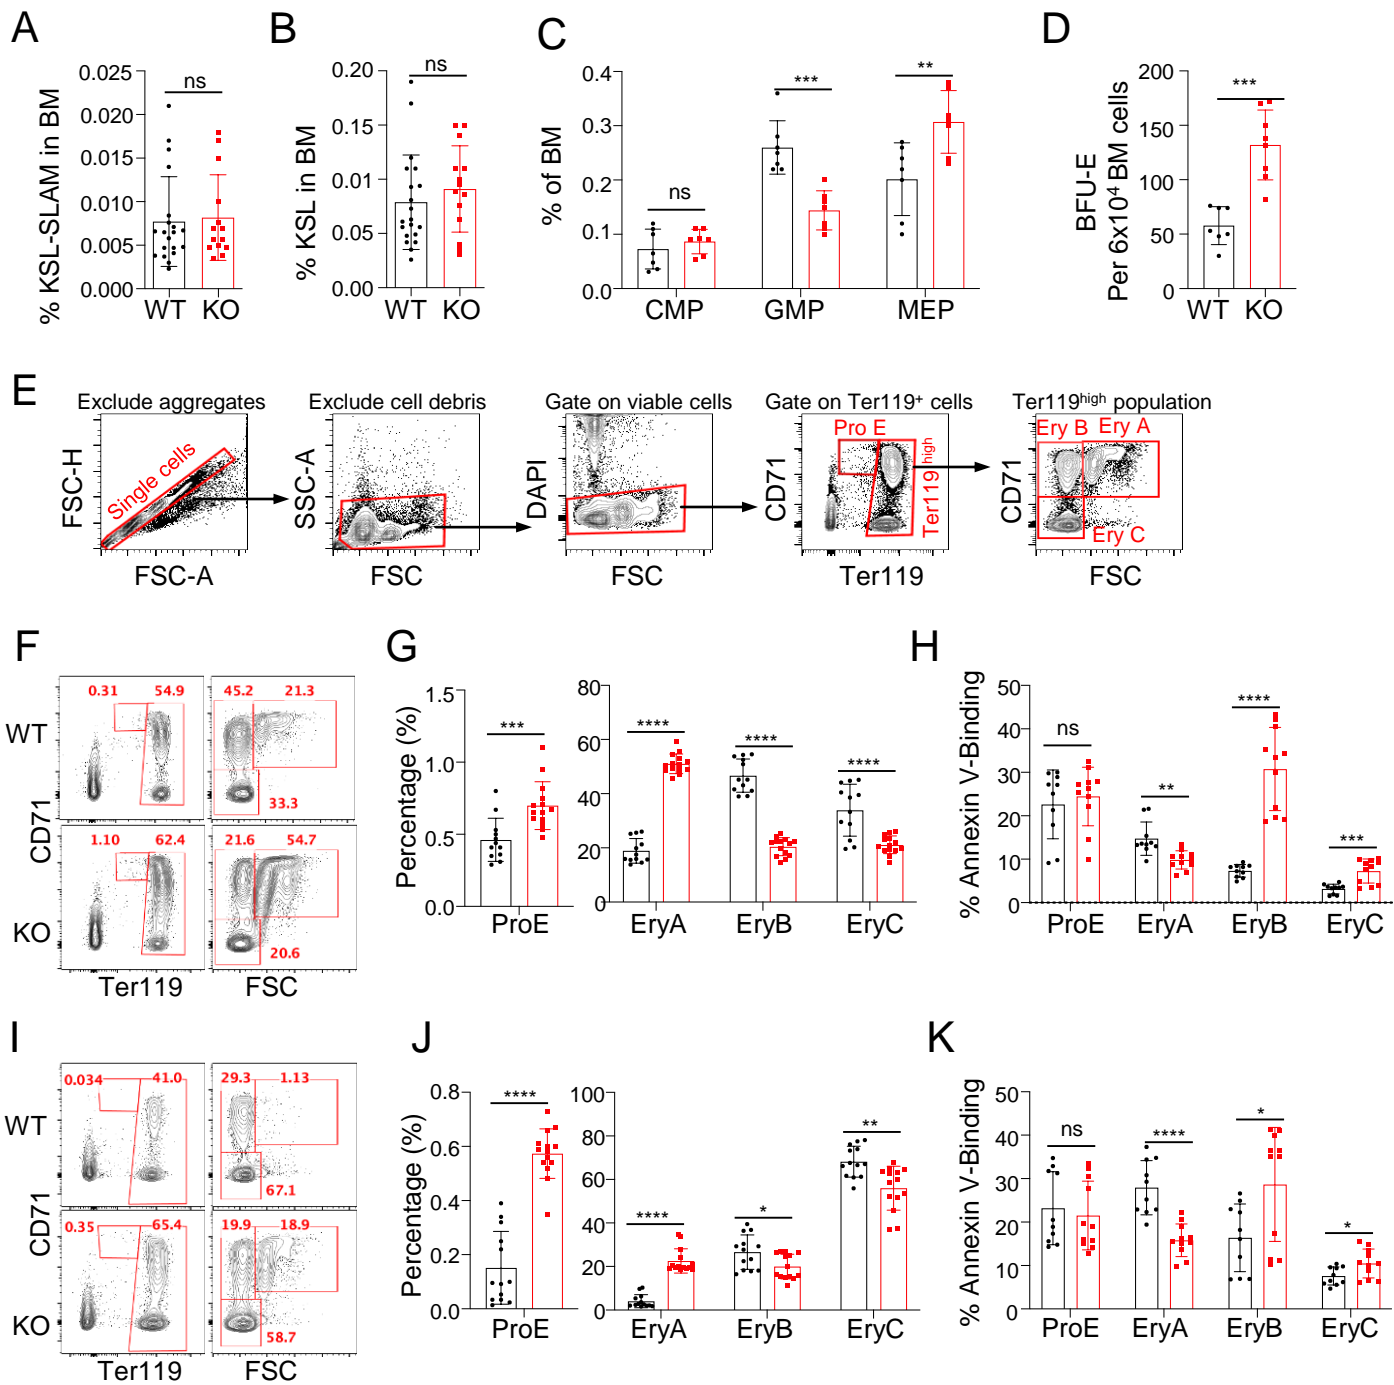

**Figure 3**

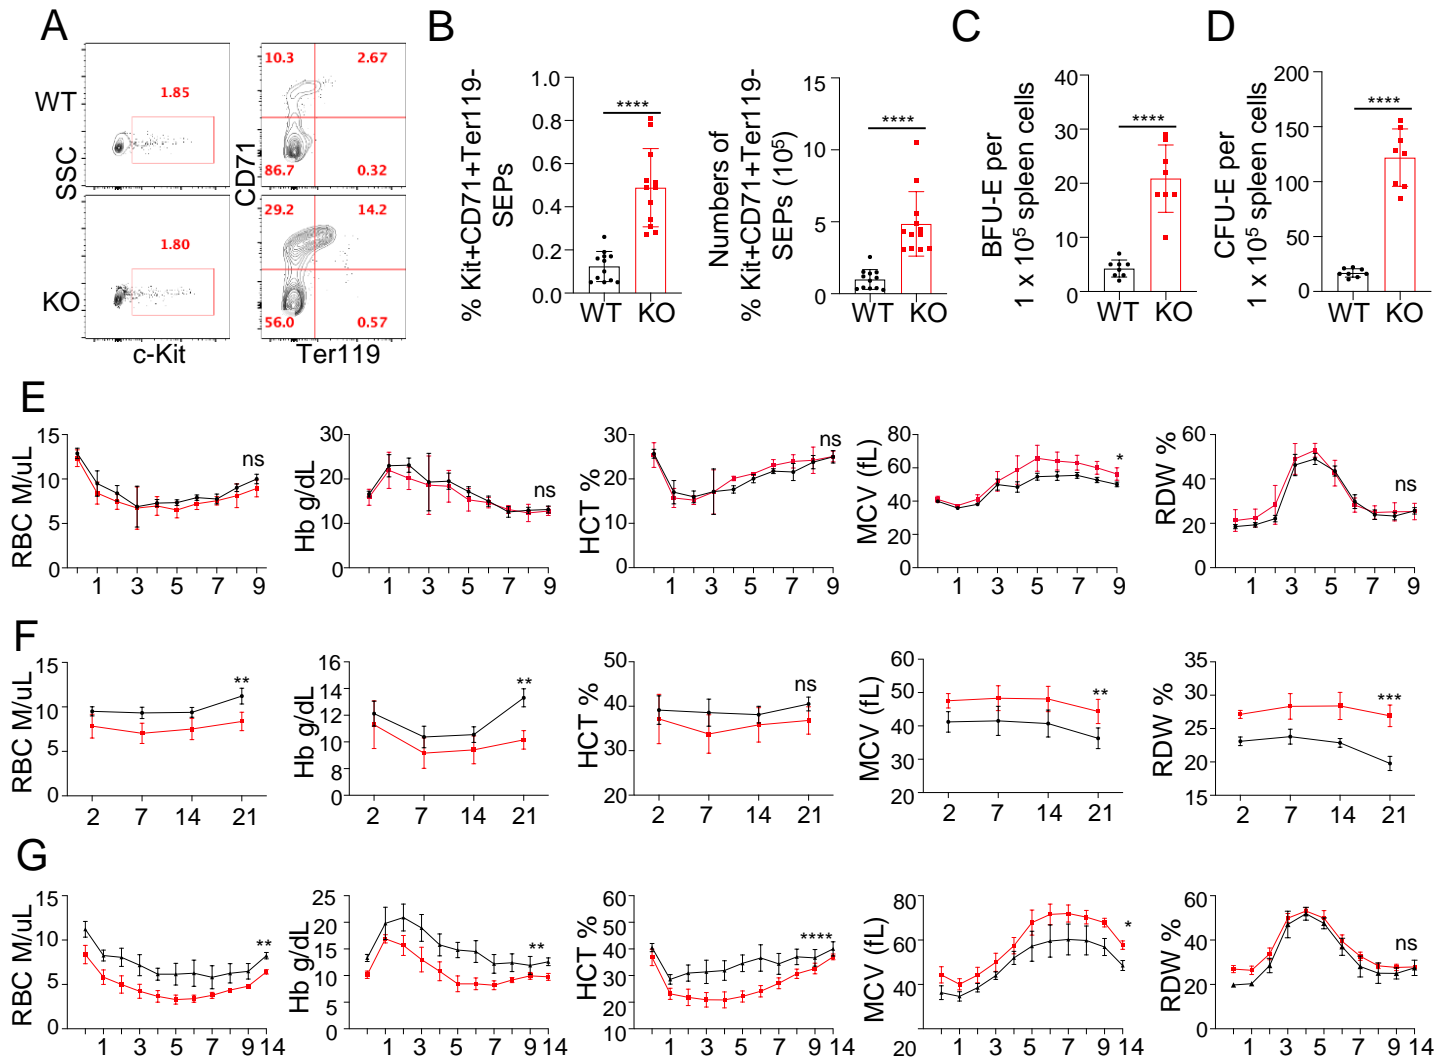

# Figure 4

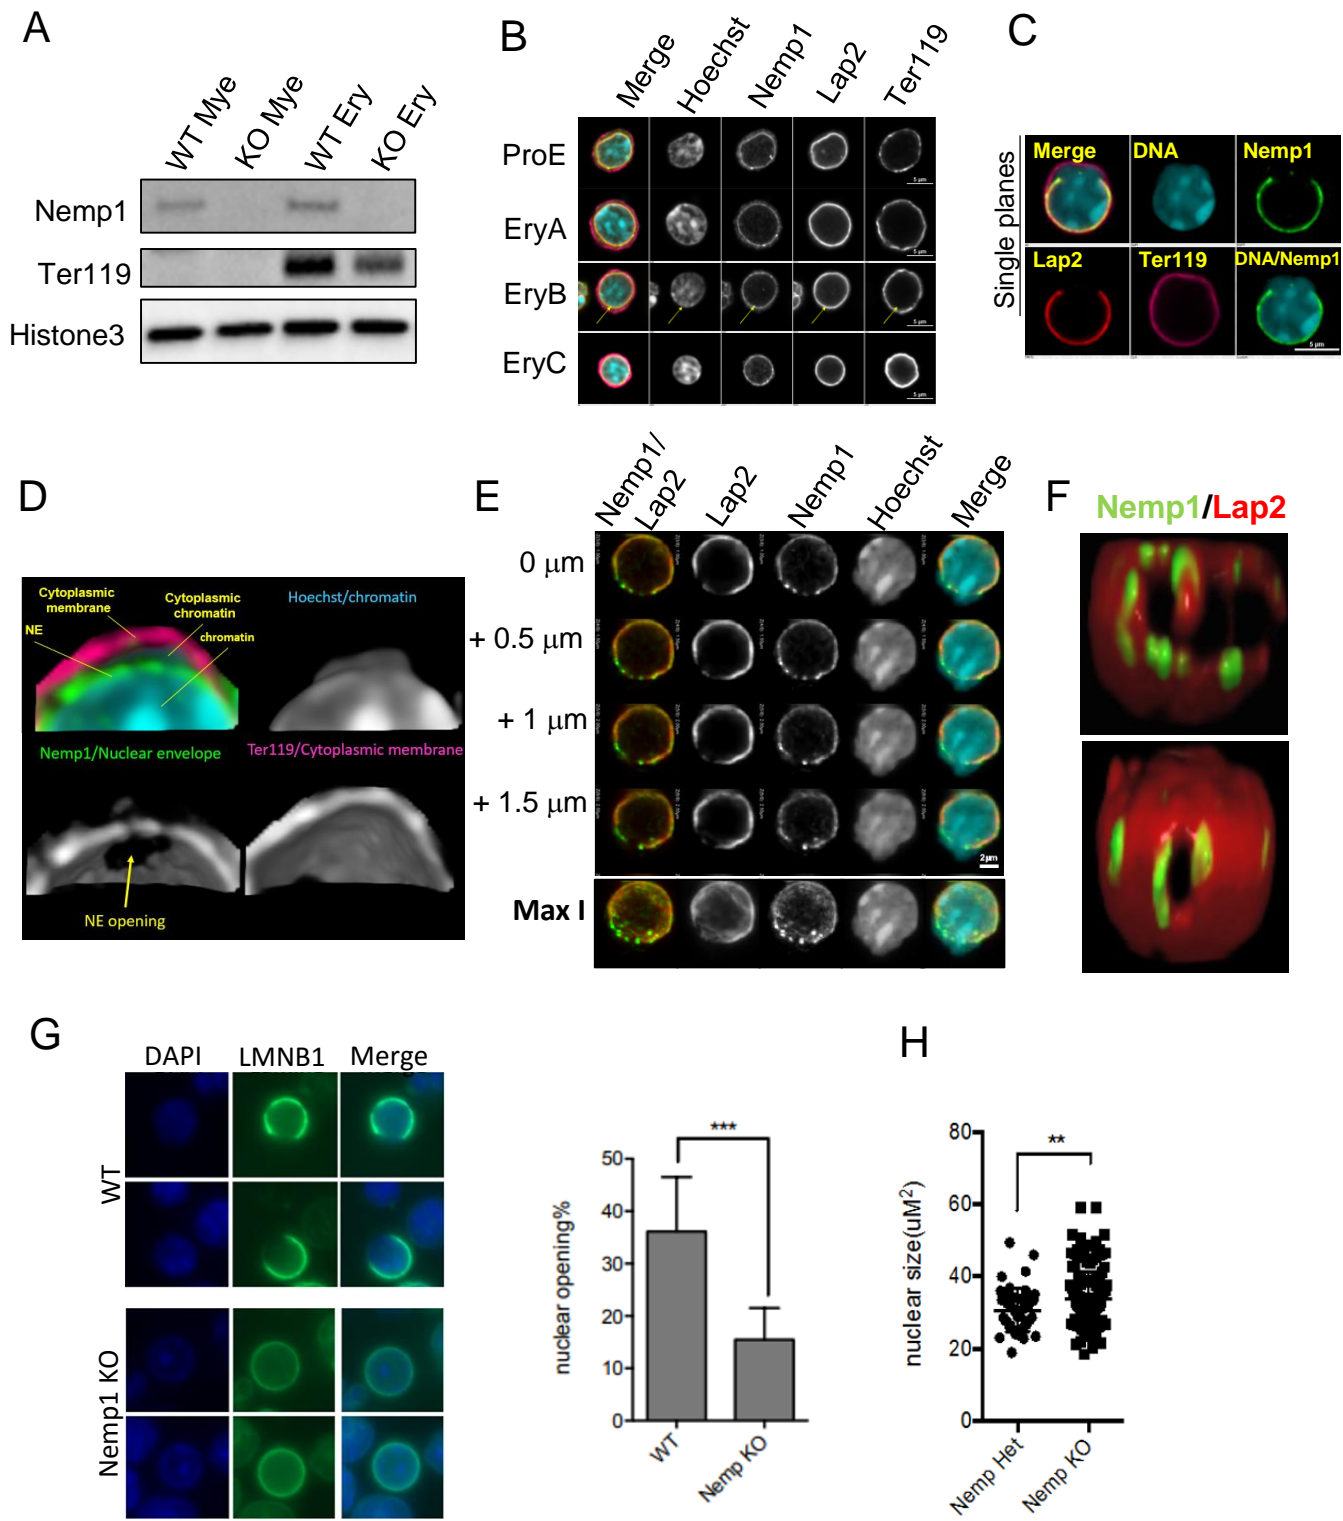

Figure 5

A

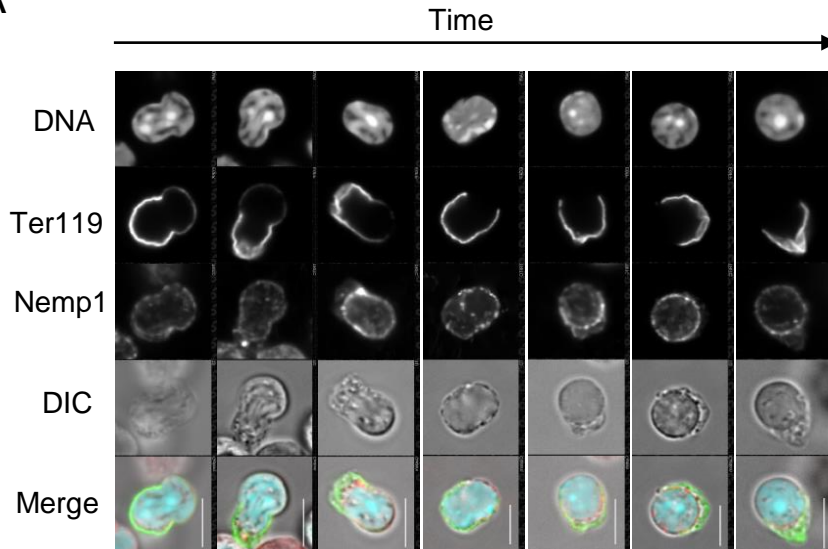

B

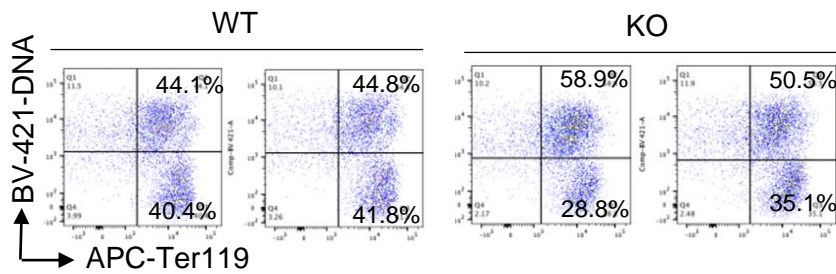

C

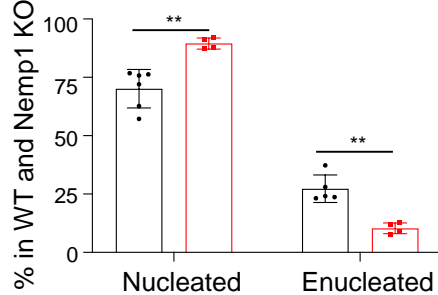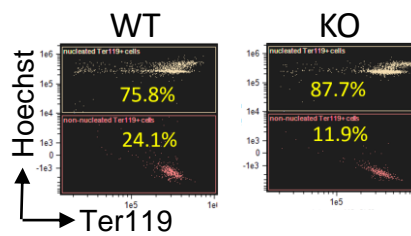

Figure 6

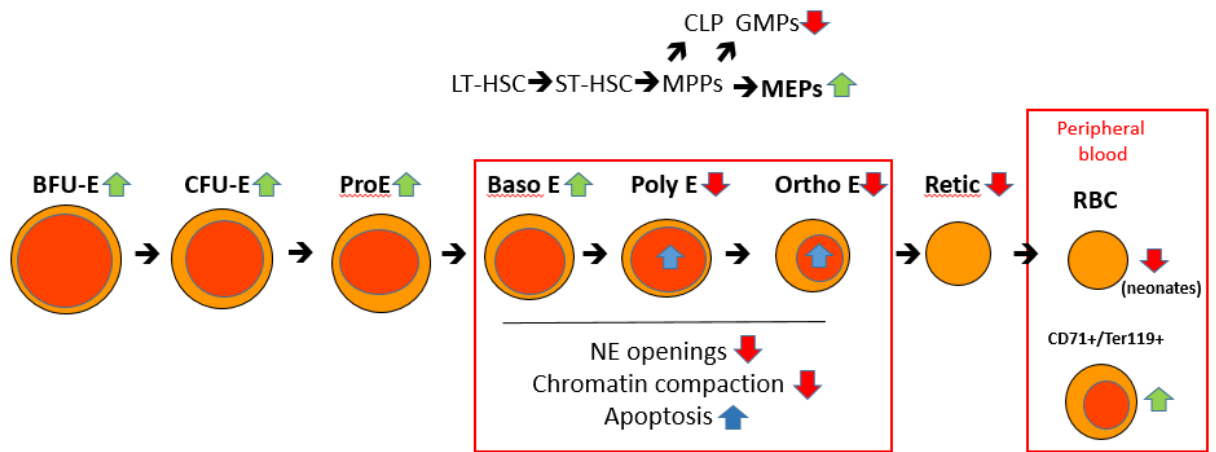

Source: http://biorxiv.org/content/10.1101/2022.05.26.493585v1.full.pdf
